# CFTR Regulates Early Pathogenesis of Chronic Obstructive Lung Disease in $\beta$ ENaC-Overexpressing Mice

Bjarki Johannesson<sup>1,3,4</sup>, Stephanie Hirtz<sup>1</sup>, Jolanthe Schatterny<sup>1</sup>, Carsten Schultz<sup>1,3,4</sup>, Marcus A. Mall<sup>1,2,4\*</sup>

**1** Department of Translational Pulmonology, Translational Lung Research Center Heidelberg (TLRC), Member of the German Center for Lung Research, University of Heidelberg, Heidelberg, Germany, **2** Division of Pediatric Pulmonology and Allergy and Cystic Fibrosis Center, Department of Pediatrics III, University of Heidelberg, Heidelberg, Germany, **3** Cell Biology and Biophysics Unit, European Molecular Biology Laboratory, Heidelberg, Germany, **4** Molecular Medicine Partnership Unit, University of Heidelberg and European Molecular Biology Laboratory, Heidelberg, Germany

## Abstract

**Background:** Factors determining the onset and severity of chronic obstructive pulmonary disease remain poorly understood. Previous studies demonstrated that airway surface dehydration in  $\beta$ ENaC-overexpressing ( $\beta$ ENaC-Tg) mice on a mixed genetic background caused either neonatal mortality or chronic obstructive lung disease suggesting that the onset of lung disease was modulated by the genetic background.

**Methods:** To test this hypothesis, we backcrossed  $\beta$ ENaC-Tg mice onto two inbred strains (C57BL/6 and BALB/c) and studied effects of the genetic background on neonatal mortality, airway ion transport and airway morphology. Further, we crossed  $\beta$ ENaC-Tg mice with CFTR-deficient mice to validate the role of CFTR in early lung disease.

**Results:** We demonstrate that the C57BL/6 background conferred increased CFTR-mediated  $\text{Cl}^-$  secretion, which was associated with decreased mucus plugging and mortality in neonatal  $\beta$ ENaC-Tg C57BL/6 compared to  $\beta$ ENaC-Tg BALB/c mice. Conversely, genetic deletion of CFTR increased early mucus obstruction and mortality in  $\beta$ ENaC-Tg mice.

**Conclusions:** We conclude that a decrease or absence of CFTR function in airway epithelia aggravates the severity of early airway mucus obstruction and related mortality in  $\beta$ ENaC-Tg mice. These results suggest that genetic or environmental factors that reduce CFTR activity may contribute to the onset and severity of chronic obstructive pulmonary disease and that CFTR may serve as a novel therapeutic target.

**Citation:** Johannesson B, Hirtz S, Schatterny J, Schultz C, Mall MA (2012) CFTR Regulates Early Pathogenesis of Chronic Obstructive Lung Disease in  $\beta$ ENaC-Overexpressing Mice. PLoS ONE 7(8): e44059. doi:10.1371/journal.pone.0044059

**Editor:** Neeraj Vij, Johns Hopkins School of Medicine, United States of America

**Received:** February 1, 2012; **Accepted:** July 30, 2012; **Published:** August 24, 2012

**Copyright:** © 2012 Johannesson et al. This is an open-access article distributed under the terms of the Creative Commons Attribution License, which permits unrestricted use, distribution, and reproduction in any medium, provided the original author and source are credited.

**Funding:** This study was supported by the German Research Foundation (DFG MA 2081/3-3 and MA 2081/4-1), the Federal Ministry of Education and Research (BMBF German Centre for Lung Research [DZL]), and the European Commission (MEXT-CT-2004-013666). The funders had no role in study design, data collection and analysis, decision to publish, or preparation of the manuscript.

**Competing Interests:** The authors have read the journal's policy and have the following conflicts: MAM is listed on a patent application filed by the University of North Carolina, describing the  $\beta$ ENaC-overexpressing mouse (patent number: 7514593; filing date: May 2003). Of note, the  $\beta$ ENaC-overexpressing mouse has been deposited at the Jackson Laboratory for general deposition. This does not alter the authors' adherence to all the PLoS ONE policies on sharing data and materials, as detailed online in the guide for authors. The other authors (BJ, SH, JS, CS) have declared that no competing interests exist.

\* E-mail: Marcus.Mall@med.uni-heidelberg.de

## Introduction

Chronic obstructive pulmonary disease (COPD) characterized by airflow obstruction due to chronic bronchitis with airways mucus plugging and/or emphysema belongs to the most common chronic diseases and has evolved as a leading cause of death worldwide [1]. Although it is well established that most COPD is caused by cigarette smoke and exposure to other environmental pollutants, the onset and severity of the disease in individuals who were exposed to similar levels of cigarette smoke is highly variable, and emerging evidence suggests that the risk of developing COPD is influenced by genetic factors [2,3]. However, the role of genetic factors and their contribution to disease-causing mechanisms in the *in vivo* pathogenesis of COPD remain poorly understood.

Previous studies in a mouse model with airway-specific overexpression of the  $\beta$ -subunit of the amiloride-sensitive  $\text{Na}^+$  channel ( $\beta$ ENaC), which constitutes a limiting pathway for absorption of  $\text{Na}^+$  and fluid across airway epithelia, identified airway surfaces

liquid (ASL) dehydration as a disease-causing mechanism of COPD and established a model to study its pathogenesis *in vivo* [4]. Proper regulation of ASL volume by coordinate regulation of ENaC-mediated  $\text{Na}^+$  absorption and  $\text{Cl}^-$  secretion mediated by the cystic fibrosis transmembrane conductance regulator (CFTR) and  $\text{Ca}^{2+}$ -activated  $\text{Cl}^-$  channels (CaCC) plays a crucial role in maintaining normal mucociliary clearance, which constitutes an important innate defense mechanism of the lung [5,6]. In  $\beta$ ENaC-overexpressing ( $\beta$ ENaC-Tg) mice, an imbalance between  $\text{Na}^+$  absorption and  $\text{Cl}^-$  secretion results in volume depletion (dehydration) of airway surfaces causing a spontaneous lung disease that shares key features with COPD in humans including impaired mucus clearance, airway mucus obstruction, goblet cell metaplasia, chronic neutrophilic inflammation with increased levels of the IL-8 homologue KC, reduced clearance of bacterial pathogens and emphysema [4,7,8]. Of note, a series of recent studies showed that cigarette smoke impairs CFTR-mediated  $\text{Cl}^-$  secretion across airway epithelia *in vitro* and *in vivo* indicating that impaired ASL

hydration may also be implicated in the pathogenesis of COPD in humans [9–12].

When  $\beta$ ENaC-overexpressing ( $\beta$ ENaC-Tg) mice were maintained on a mixed genetic background (C3H/He x C57BL/6), we noted that the pulmonary phenotype was highly variable. Around 50% of  $\beta$ ENaC-Tg mice died during the neonatal period due to severe mucus plugging of the trachea associated with hypoxic degeneration of airway epithelial cells and asphyxia, whereas the surviving  $\beta$ ENaC-Tg mice developed chronic bronchitis and emphysema [4,13]. These observations suggested that similar to COPD in humans, the COPD-like lung disease in this model may also be modulated by the genetic background.

In the present study, we therefore backcrossed  $\beta$ ENaC-Tg mice onto two distinct inbred mouse strains (C57BL/6 and BALB/c) and performed quantitative phenotyping to test the hypothesis that dehydration-induced lung disease can be influenced by the genetic background. Because lung disease in  $\beta$ ENaC-Tg mice is caused by a dysbalance between absorption and secretion of NaCl and fluid across airway surfaces, a focus of our studies was on the impact of the genetic background on ENaC-mediated  $\text{Na}^+$  transport and  $\text{Cl}^-$  secretion mediated by CFTR and  $\text{Ca}^{2+}$ -activated  $\text{Cl}^-$  channels (CaCC) in freshly excised airway tissues. Further, we studied the effects of the genetic background on mortality and other characteristic early lesions, i.e. mucus plugging of the trachea, airway epithelial necrosis and inflammation at neonatal ages, and on characteristic features of chronic lung disease including airway mucus obstruction, goblet cell metaplasia, airway inflammation and emphysema formation in surviving  $\beta$ ENaC-Tg mice [4,13]. Because these studies indicated that background-dependent differences in CFTR activity were associated with the severity of neonatal mucus plugging, airway epithelial necrosis and mortality, we also crossed  $\beta$ ENaC-Tg mice with gut-corrected CFTR-deficient mice [14] to validate the role of CFTR for the onset and severity of early airways disease.

## Materials and Methods

### Experimental animals

All animal studies were approved by the Animal Care and Use Committee of the Regierungspräsidentium Karlsruhe, Germany (approval number 35–9185.81/G-120/05). The  $\beta$ ENaC-Tg mouse (line 6608) was originally generated on a mixed genetic background (C3H/He x C57BL/6) [15,16] and backcrossed to C57BL/6 and BALB/c backgrounds for a minimum of 10 generations. Transgene positive animals were identified by PCR of genomic DNA, as previously described [15].  $\beta$ ENaC-Tg mice on the C57BL/6 and BALB/c background were studied at neonatal (3-day-old) and adult (3-week-old) ages, and wild-type (WT) littermates served as controls in all experiments. Gut corrected CF (CFTR<sup>-/-</sup>) mice overexpressing human CFTR in the intestine under control of the fatty acid binding protein promoter (FABP-hCFTR-CFTR<sup>-/-</sup>) on the FVB background were kindly provided by Dr. Jeffrey A. Whitsett and genotyped, as previously described [14]. The gut-specific overexpression of hCFTR rescues the lethal intestinal phenotype of CF mice thus allowing studies of the effect of CFTR deficiency in the lung independent of concomitant intestinal obstruction [14]. Gut corrected CF mice (FABP-hCFTR-CFTR<sup>-/-</sup>) were intercrossed with  $\beta$ ENaC-Tg mice on the C57BL/6 background and double-transgenic  $\beta$ ENaC-Tg/CF mice, single-transgenic  $\beta$ ENaC-Tg mice, CF mice and WT littermate controls were studied at newborn (PN 0.5) and neonatal (3-day-old) ages. All mice used in this study carried the FABP-hCFTR transgene. Experimental mice were

housed in a specific pathogen-free animal facility and had free access to chow and water.

### Electrogenic ion transport measurements

Neonatal (3-day-old) mice were deeply anesthetized via intraperitoneal injection of a combination of ketamin/xylazin (120 mg/kg and 16 mg/kg, respectively) and killed by exsanguination. Tracheal tissues were dissected and mounted into perfused micro-Ussing chambers with a circular open area of 0.5 mm<sup>2</sup> [17]. The luminal and basolateral bath was perfused continuously at a rate of ~10 ml/min, with a solution of the following composition (mM): NaCl 145, KH<sub>2</sub>PO<sub>4</sub> 0.4, K<sub>2</sub>HPO<sub>4</sub> 1.6, D-glucose 5, MgCl<sub>2</sub> 1, Ca-gluconate 1.3, pH 7.4, at 37°C. Experiments were performed under open-circuit conditions as previously described [17,18]. In brief, values for the transepithelial voltage ( $V_{te}$ ) were referenced to the serosal side. The transepithelial resistance ( $R_{te}$ ) was determined by applying intermittent (1 s) current pulses ( $\Delta I = 0.5 \mu\text{A}$ ) and the equivalent short-circuit current ( $I_{sc}$ ) was calculated according to Ohm's law from  $V_{te}$  and  $R_{te}$  ( $I_{sc} = V_{te}/R_{te}$ ). After an equilibration period of 40 minutes in the Ussing chamber, basal  $I_{sc}$  was determined and amiloride (100  $\mu\text{M}$ , luminal) was added to inhibit electrogenic  $\text{Na}^+$  absorption. Then, 3-isobutyl-1-methylxanthine (IBMX; 100  $\mu\text{M}$ , luminal) and forskolin (1  $\mu\text{M}$ , luminal) were added to induce cAMP-mediated  $\text{Cl}^-$  secretion. In some experiments, we also added uridine-5'-triphosphate (UTP) (100  $\mu\text{M}$ , luminal) to induce  $\text{Ca}^{2+}$ -activated  $\text{Cl}^-$  secretion [17]. In additional protocols, tissues were treated which bumetanide (100  $\mu\text{M}$ , basolateral), an inhibitor of the basolateral  $\text{Na}^+\text{-K}^+\text{-2Cl}^-$  cotransporter in the presence of amiloride to block transepithelial  $\text{Cl}^-$  secretion [17]. Further, the CFTR blocker CFTR<sub>inh</sub>-172 (20  $\mu\text{M}$ , luminal) was added to amiloride-pretreated tissues in the absence or presence of cAMP-mediated stimulation (IBMX/forskolin) to determine CFTR-mediated  $\text{Cl}^-$  secretion [19]. Amiloride dose-response curves were obtained by measuring the change in  $I_{sc}$  induced by exposing tissues to increasing concentrations of amiloride ( $10^{-9}$  to  $10^{-3}$  M, luminal) and plotted as remaining amiloride-sensitive  $I_{sc}$  ( $I$ ) normalized to the maximal amiloride-sensitive  $I_{sc}$  ( $I_{max}$ ).  $IC_{50}$  values were determined by fitting dose-response data to the Hill equation with the Hill coefficient constrained to 1.0:  $I_{ami} = I_{max} * [1 - 1/(1 + IC_{50}/A)]$ , where  $A$  is the apical bath amiloride concentration. Amiloride, IBMX, forskolin and bumetanide were obtained from Sigma (Steinheim, Germany), UTP was obtained from GE Healthcare (Buckinghamshire, UK) and the CFTR inhibitor-172 was obtained from Calbiochem (Darmstadt, Germany). All chemicals were of the highest purity grade available.

### Histology and airway morphometry

Anesthetized mice were killed by exsanguination, lungs and tracheae were removed through a median sternotomy, immersion fixed in 4% buffered formalin, and embedded in paraffin. Tracheae were sectioned longitudinally, and lungs were sectioned transversally at the level of the proximal intrapulmonary main axial airway near the hilus. Sections were cut at 5  $\mu\text{m}$  and stained with hematoxylin and eosin (H&E) or alcian blue periodic acid-Schiff (AB-PAS) as previously described [4]. For quantitative assessment of airway mucus obstruction, we used Analysis B image analysis software (Olympus, Hamburg, Germany) to determine mucus volume density as previously described [4]. In brief, images of airway sections were taken with an Olympus IX-71 microscope (Olympus, Hamburg, Germany), the length of the airway boundary, as defined by the epithelial basement membrane, was measured by the interactive image measurement tool and the AB-PAS positive surface area within this boundary was measured by

phase analysis according to the automatic threshold settings of the software. The volume density of airway mucus, representing the volume of airway mucus content per surface area of the basement membrane ( $\text{nl}/\text{mm}^2$ ), was determined from the surface area of AB-PAS positive mucus and the basement membrane length, as previously described [20,21]. Goblet cells were identified by the presence of intracellular AB-PAS positive material and degenerative airway epithelial cells were identified by morphologic criteria (i.e., cell swelling with cytoplasmic vacuolization), and numeric cell densities were quantitated by counting epithelial cells per mm of the basement membrane [4].

### Lung volume and mean linear intercepts

Lungs of 3-week-old mice were inflated with 4% buffered formalin to 25 cm of fixative pressure, and lung volume determined by the volume displacement method [22]. Subsequently, lungs were processed for histology, sectioned at 5  $\mu\text{m}$ , and stained with hematoxylin and eosin (H&E). Histological images were digitally captured with an Olympus IX 71 microscope, using Analysis B image analysis software (Olympus, Hamburg, Germany) with a line counting tool at a magnification of 16x beginning at a randomly selected point. Mean linear intercepts were determined by dividing the sum of the lengths of all lines in all frames by the number of intercepts between alveolar septi and counting lines, as previously described [4,23]. For each animal, we measured a minimum of 200 intercepts sampled in 10 fields in different lobes.

### Real-time RT-PCR

Tracheal tissues were immediately stored in RNA later (Applied Biosystems, Darmstadt, Germany). RNA was isolated by using Trizol reagent (Invitrogen, Karlsruhe Germany) and RNeasy Mini Kit (Qiagen, Hilden, Germany). RNA from tracheae of four neonatal mice of the same genotype were pooled, RNA purity and quantity was determined using a NanoDrop ND100 spectrophotometer (PegLab, Erlangen, Germany) and integrity was verified by with Agilent 2100 Bioanalyzer (Agilent Technologies, Santa Clara, CA, USA). cDNA was obtained by reverse transcription of 1  $\mu\text{g}$  of total RNA (Superscript III RT; Invitrogen, Karlsruhe, Germany). Quantitative real-time RT-PCR for  $\alpha\text{ENaC}$ ,  $\beta\text{ENaC}$ ,  $\gamma\text{ENaC}$ , CFTR, *Muc5b* and glyceraldehyde 3-phosphate dehydrogenase (*Gapdh*) was performed on an Applied Biosystems 7500 Real Time PCR System using TaqMan universal PCR master mix and inventoried TaqMan gene expression assays according to the manufacturer's instructions (Applied Biosystems, Darmstadt, Germany). Relative fold changes in target gene expression were determined from the efficiency of the PCR reaction and the crossing point deviation between WT and  $\beta\text{ENaC-Tg}$  from the C57BL/6 and BALB/c backgrounds and normalized to the expression of the reference gene *Gapdh*, as previously described [4,24].

### BAL cell counts and cytokine measurements

Adult mice were deeply anesthetized, the trachea cannulated, and the lung lavaged with PBS. Bronchoalveolar lavage (BAL) samples were centrifuged, total cell counts were determined in a hemocytometer and differential cell counts were determined on cytospin preparations stained with May-Grünwald-Giemsa, as previously described [4,24]. Concentrations of KC and  $\text{TNF-}\alpha$  in neonatal mouse lungs were measured in lung homogenates using ELISA (R&D Systems, Minneapolis, MN) according to manufacturer's instructions. In briefly, neonatal lungs were homogenized in 250  $\mu\text{l}$  of PBS containing protease inhibitors (Roche,

Mannheim, Germany), homogenates were centrifuged and the cell-free supernatant was used for ELISA [4].

### Statistics

All experiments were performed by an investigator blinded to the genotype of the mice. Data were analysed with SigmaStat version 3.1 (Systat Software, Erkrath, Germany) and are reported as mean  $\pm$  SEM. Statistical analyses were performed using unpaired Student's *t*-test, Mann-Whitney Rank Sum test, Chi-square test, Kaplan-Meier survival analysis, as appropriate and  $P < 0.05$  was accepted to indicate statistical significance.

## Results

### Survival of $\beta\text{ENaC-Tg}$ mice is modified by genetic background

On a mixed genetic background (C3H/HeN x C57BL/6), around 50% of  $\beta\text{ENaC-Tg}$  mice died due to severe airway mucus obstruction in the first weeks of life, whereas the remaining  $\sim 50\%$  showed normal survival but developed chronic obstructive lung disease [4,13,15]. We speculated that this variability in disease severity may be determined by modifiers in the genetic background. We therefore backcrossed  $\beta\text{ENaC-Tg}$  mice with the original mixed background to the inbred C57BL/6 and BALB/c backgrounds, respectively (Fig. 1). Compared to the mixed background, backcross to C57BL/6 significantly reduced mortality of  $\beta\text{ENaC-Tg}$  mice to 14% ( $n = 46$ ,  $P < 0.05$ ), whereas backcross to the BALB/c background significantly increased mortality to 81% ( $n = 36$ ,  $P < 0.05$ ). These results indicate that mortality of  $\beta\text{ENaC-Tg}$  mice is modulated by the genetic background.

### Genetic background modulates airway ion transport in WT and $\beta\text{ENaC-Tg}$ mice

Early death in  $\beta\text{ENaC-Tg}$  mice is caused by a dysbalance of airway  $\text{Na}^+$  absorption and  $\text{Cl}^-$  secretion producing ASL volume depletion and airway mucus plugging [15]. We therefore hypothesized that the background-dependent differences in mortality may be related to differences in airway epithelial  $\text{Na}^+$  and/or  $\text{Cl}^-$  transport in neonatal  $\beta\text{ENaC-Tg}$  mice on the C57BL/6 *versus* BALB/c backgrounds. To test this hypothesis, we determined basal bioelectric properties, amiloride-sensitive  $\text{Na}^+$  absorption, and cAMP-induced and  $\text{Ca}^{2+}$ -activated (UTP-mediated)  $\text{Cl}^-$  secretion in freshly excised tracheal tissues from

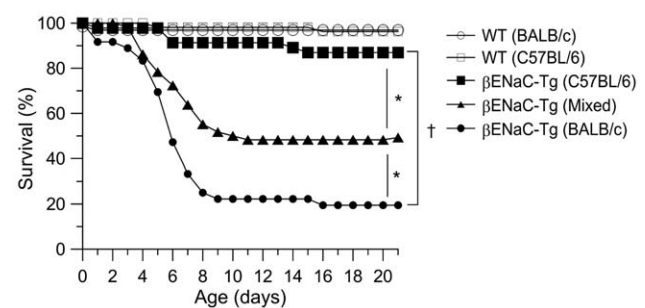

**Figure 1. Survival of  $\beta\text{ENaC-Tg}$  mice is modified by genetic background.** Survival curves of  $\beta\text{ENaC-Tg}$  mice and wild-type (WT) littermates on mixed (C3H/He x C57BL/6), C57BL/6 and BALB/c backgrounds ( $n = 36\text{--}59$  mice per group). \* $P < 0.05$  and † $P < 0.01$  (Kaplan-Meier survival analysis).

doi:10.1371/journal.pone.0044059.g001

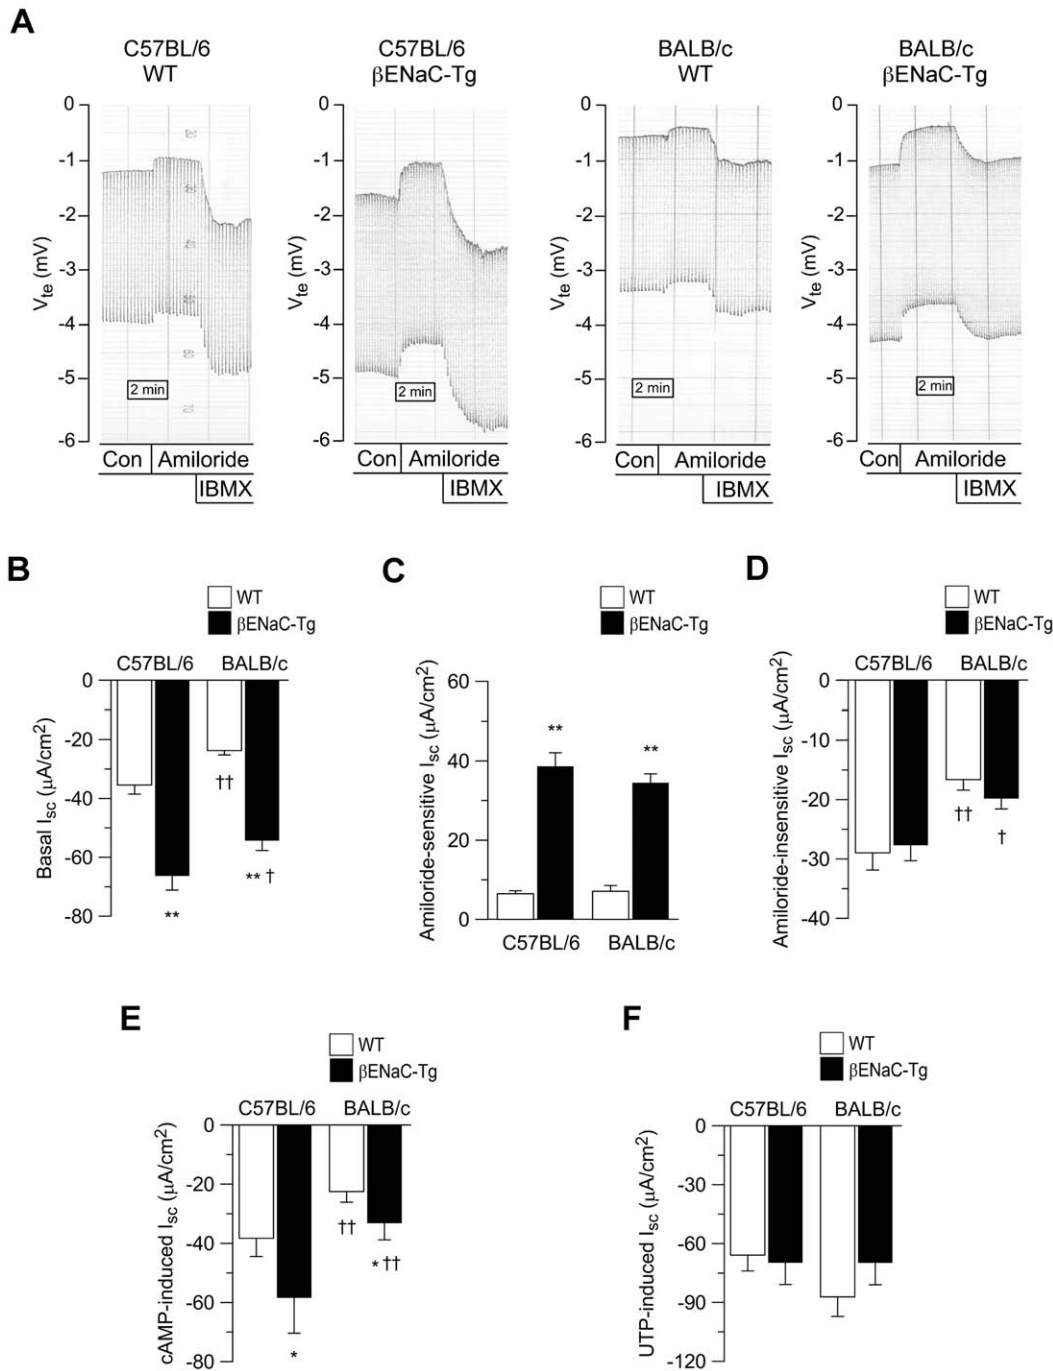

**Figure 2. Genetic background modulates airway ion transport in wild-type and  $\beta$ ENaC-Tg mice.** A) Representative original recordings of the effects of amiloride and cAMP-dependent activation (IBMX/forskolin) on transepithelial voltage ( $V_{te}$ ) and transepithelial resistance ( $R_{te}$ ) across freshly excised tracheal tissues from neonatal (3-day-old) wild-type (WT) and  $\beta$ ENaC-Tg mice on the C57BL/6 and BALB/c background.  $R_{te}$  was determined from  $V_{te}$  deflections obtained by pulsed current injection. (B–F) Summary of basal equivalent short-circuit current ( $I_{sc}$ ) (B), amiloride-sensitive  $I_{sc}$  (C), amiloride-insensitive  $I_{sc}$  (D), cAMP-induced  $I_{sc}$  (E) and UTP-induced  $I_{sc}$  (F) in freshly excised tracheal tissues from neonatal WT and  $\beta$ ENaC-Tg mice on the C57BL/6 and BALB/c background. Data are presented as mean  $\pm$  SEM ( $n=8-20$  mice per group). \* $P<0.05$  and \*\* $P<0.001$  compared with WT mice on same strain background, † $P<0.05$  and †† $P<0.01$  compared with mice of same genotype on C57BL/6 background. doi:10.1371/journal.pone.0044059.g002

3-day-old neonatal  $\beta$ ENaC-Tg mice on the C57BL/6 and BALB/c backgrounds and their respective WT littermates (Fig. 2).

Similar to previous results on the mixed background, the comparison between WT and  $\beta$ ENaC-Tg tissues within each inbred background demonstrated that overexpression of  $\beta$ ENaC significantly increased basal and amiloride-sensitive  $I_{sc}$  in both

C57BL/6 and BALB/c mice ( $P<0.001$ ) (Fig. 2A–C). Further, the cAMP-induced  $I_{sc}$  was increased and the UTP-mediated  $I_{sc}$  remained unchanged in  $\beta$ ENaC-Tg tissues from both backgrounds compared to their respective WT tissues (Fig. 2A,E,F). Of note, the comparison between the two inbred backgrounds (i.e. C57BL/6 versus BALB/c) identified substantial effects of the genetic

background on several components of airway ion transport. Specifically, the basal  $I_{sc}$ , amiloride-insensitive  $I_{sc}$  and cAMP-induced  $I_{sc}$  were significantly greater in WT tissues from the C57BL/6 background compared to the BALB/c background ( $P < 0.01$  to  $P < 0.001$ ) (Fig. 2A,B,D,E). Similar background-dependent differences were observed for  $\beta$ ENaC-Tg tissues ( $P < 0.05$  to  $P < 0.01$ ) (Fig. 2A,B,D,E). These results suggest that the C57BL/6 background is associated with higher levels of basal and cAMP-induced  $Cl^-$  secretion in both WT and  $\beta$ ENaC-Tg airways.

Conversely, the genetic background had no effect on the magnitude of amiloride-sensitive  $Na^+$  transport in airways from WT or  $\beta$ ENaC-Tg mice (Fig. 2C). Because previous studies indicated that overexpression of  $\beta$ ENaC produces a subpopulation of  $\alpha\beta$ ENaC channels that are less sensitive to amiloride and physiological ENaC inhibitors (including endogenous anti-proteases) than normal  $\alpha\beta\gamma$ ENaC channels, and that these dysregulated  $\alpha\beta$ ENaC channels may therefore aggravate ASL depletion under physiological “thin film” conditions *in vivo* [25,26], we also determined transcript levels of  $\alpha$ -,  $\beta$ -, and  $\gamma$ ENaC subunits and amiloride sensitivity in WT and  $\beta$ ENaC-Tg tracheal tissues from the C57BL/6 and BALB/c backgrounds. In  $\beta$ ENaC-Tg airways from both backgrounds,  $\beta$ ENaC mRNA was overexpressed to similar levels (Fig. S1A-C), which produced a similar decrease in amiloride sensitivity, as determined from similar shifts of the amiloride dose-response curves and  $IC_{50}$  values on both backgrounds (Fig. S1D-F). Collectively, these results indicate that the genetic background had no effect on the magnitude or regulation of increased airway  $Na^+$  transport in  $\beta$ ENaC-Tg mice.

### Genetic background modulates CFTR-mediated $Cl^-$ secretion in airways of WT and $\beta$ ENaC-Tg mice

To obtain a more detailed characterization of the origin of the increased amiloride-insensitive  $I_{sc}$  observed in tracheal tissues of neonatal C57BL/6 WT and  $\beta$ ENaC-Tg mice compared to BALB/c mice of the same genotype, we perfused tissues with bumetanide to block transepithelial  $Cl^-$  secretion or CFTR<sub>inh</sub>-172 to probe for CFTR activity. Similar to previous studies in adult BALB/c WT mice [17], the amiloride-insensitive  $I_{sc}$  was largely abolished by bumetanide in neonatal WT and  $\beta$ ENaC-Tg tissues from both backgrounds (Fig. 2D and Fig. 3A) demonstrating that this residual current reflected basal  $Cl^-$  secretion. Of note, the bumetanide-sensitive  $I_{sc}$  was significantly increased in tracheal tissues from WT and  $\beta$ ENaC-Tg mice on the C57BL/6 compared to the BALB/c background ( $P < 0.05$  and  $P < 0.01$ ) (Fig. 3A) demonstrating that basal  $Cl^-$  secretion was greater on the C57BL/6 background independent of the genotype. Consistent with previous studies in neonatal CFTR-deficient mice [27], we show that ~50% of the amiloride-insensitive  $I_{sc}$  were inhibited by CFTR<sub>inh</sub>-172 (Fig. 2D and Fig. 3B) indicating that CFTR contributes to basal  $Cl^-$  secretion in the neonatal trachea. Similar to bumetanide, the CFTR<sub>inh</sub>-172-sensitive  $I_{sc}$  was significantly increased in tracheal tissues from WT and  $\beta$ ENaC-Tg mice on the C57BL/6 compared to the BALB/c background ( $P < 0.05$  to  $P < 0.01$ ).

Because cAMP-induced  $Cl^-$  secretory responses were also increased in airways from C57BL/6 compared to BALB/c mice (Fig. 2E), we next determined the effects of CFTR<sub>inh</sub>-172 in the presence of cAMP-dependent stimulation. The cAMP-induced  $I_{sc}$  was largely abolished by CFTR<sub>inh</sub>-172 in WT and  $\beta$ ENaC-Tg mice on both backgrounds (Fig. 2E and Fig. 3C). Interestingly, the magnitude of CFTR<sub>inh</sub>-172-sensitive  $I_{sc}$  in the presence of cAMP-mediated activation was significantly increased in airways from WT and  $\beta$ ENaC-Tg mice on the C57BL/6 compared to the BALB/c background ( $P < 0.05$ ). Taken together, these results

demonstrate that CFTR-mediated  $Cl^-$  secretion is increased in native airway tissues from neonatal C57BL/6 compared with BALB/c mice and suggest that higher levels of  $Cl^-$  secretion may counteract ASL depletion due to increased  $Na^+$  absorption and thus improve mucus clearance in  $\beta$ ENaC-Tg mice [4,13,15].

To determine, if strain-dependent differences in CFTR-mediated  $Cl^-$  conductance were caused by differences in CFTR transcript levels, we next compared CFTR mRNA expression in freshly excised tracheal tissues in WT and  $\beta$ ENaC-Tg mice on both backgrounds. These studies showed that the genetic background had no effect on relative CFTR mRNA levels in either WT mice ( $1.0 \pm 0.10$  for WT C57BL/6 mice versus  $0.96 \pm 0.12$  for WT BALB/c mice;  $n = 6$  per group;  $P = 0.91$ ) or  $\beta$ ENaC-Tg mice ( $1.0 \pm 0.08$  for  $\beta$ ENaC-Tg C57BL/6 versus  $1.03 \pm 0.16$  for  $\beta$ ENaC-Tg BALB/c;  $n = 6$  per group;  $P = 0.87$ ) suggesting that the strain-dependent differences in CFTR-mediated  $Cl^-$  transport reflect differences in post-transcriptional regulation of CFTR in murine airways.

### Genetic background modifies early airway mucus obstruction and epithelial necrosis but not inflammation in neonatal $\beta$ ENaC-Tg mice

To determine the relationship between background-dependent differences in airway  $Cl^-$  secretion and early mucus plugging, we next compared the extent of intraluminal mucus obstruction and transcript levels of the airway mucin Muc5b in lungs from 3-day-old neonatal  $\beta$ ENaC-Tg mice on the C57BL/6 and BALB/c backgrounds. Similar to previous studies on the mixed genetic background [4,13], mucus obstruction was readily detected in the trachea, but not in intrapulmonary airways of neonatal  $\beta$ ENaC-Tg mice on both backgrounds (Fig. 4A,B and data not shown). Morphometric analyses of tracheal sections demonstrated that mucus content was significantly decreased (~2-fold) in  $\beta$ ENaC-Tg mice on the C57BL/6 compared to the BALB/c background ( $P < 0.05$ ). These differences in tracheal mucus content were not associated with differences in goblet cell densities or levels of Muc5b mRNA expression in the lung. These results indicate that distinct levels of mucus obstruction in  $\beta$ ENaC-Tg C57BL/6 *versus*  $\beta$ ENaC-Tg BALB/c mice did not reflect background-related differences in mucus production, as estimated from Muc5b transcript levels and the numbers of mucin producing cells (Fig. 4A–D).

In addition to airway mucus obstruction, unregulated  $Na^+$  absorption was shown to produce cellular hypoxia, hydropic degeneration and necrosis of airway epithelial cells constituting another characteristic lesion in neonatal  $\beta$ ENaC-Tg mice [4,26]. We, therefore, compared the extent of epithelial necrosis in 3-day-old  $\beta$ ENaC-Tg mice on the C57BL/6 compared to the BALB/c background (Fig. 4E,F). Necrotic airway cells were readily detected in  $\beta$ ENaC-Tg mice from both backgrounds, however, the number of necrotic cells was significantly decreased on the C57BL/6 compared to the BALB/c background (Fig. 4F).

Previous studies in  $\beta$ ENaC-Tg mice on a mixed genetic background demonstrated that early airway mucus obstruction and epithelial necrosis were associated with the onset of airway inflammation [4]. Accordingly, expression of the pro-inflammatory cytokines KC and TNF- $\alpha$  was also increased in lung homogenates from  $\beta$ ENaC-Tg compared to WT neonates on the C57BL/6 as well as BALB/c background (Fig. S2A,B). In contrast to mucus obstruction and epithelial necrosis (Fig. 4), levels of KC and TNF- $\alpha$  were not different in  $\beta$ ENaC-Tg mice on the C57BL/6 compared to the BALB/c background (Fig. S2A,B). Taken together, these results indicate that higher levels of endogenous CFTR-mediated  $Cl^-$  secretion on the C57BL/6

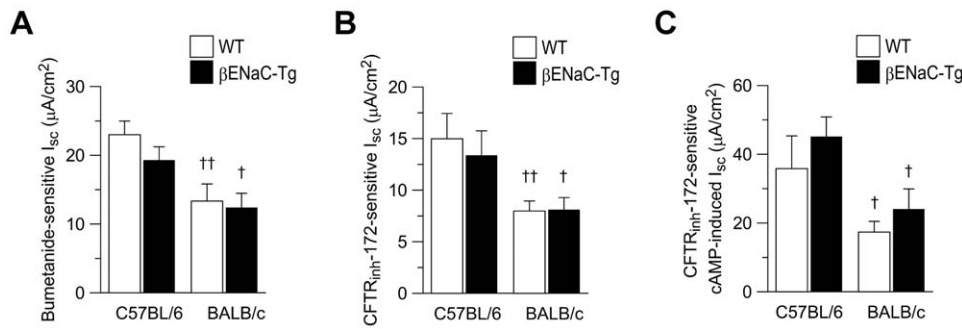

**Figure 3. Genetic background modulates CFTR-mediated Cl<sup>-</sup> secretion in airways of wild-type and βENaC-Tg mice.** A–C) Effects of genetic background on transepithelial Cl<sup>-</sup> secretion were determined by adding bumetanide or CFTR<sub>inh</sub>-172 to amiloride-pretreated tracheal tissues from neonatal wild-type (WT) and βENaC-Tg mice on the C57BL/6 and BALB/c background. A,B) Summary of bumetanide-sensitive I<sub>sc</sub> (A) and CFTR<sub>inh</sub>-172-sensitive I<sub>sc</sub> (B) in the presence of amiloride ( $n = 12$ –23 mice per group). C) Summary of CFTR<sub>inh</sub>-172-sensitive I<sub>sc</sub> in the presence of amiloride and cAMP-dependent activation (IBMX/forskolin) ( $n = 5$ –11 mice per group). Data are presented as mean  $\pm$  SEM.  $\dagger P < 0.05$  and  $\dagger\dagger P < 0.01$  compared with mice of same genotype on C57BL/6 background. doi:10.1371/journal.pone.0044059.g003

background counteracted some of the early consequences of Na<sup>+</sup> hyperabsorption and reduced early death due to airway mucus plugging in βENaC-Tg mice. Conversely, our results also suggest that the lower levels of airway mucus obstruction and necrosis

observed in βENaC-Tg C57BL/6 mice were sufficient to trigger inflammation to a similar level as observed in βENaC-Tg BALB/c mice.

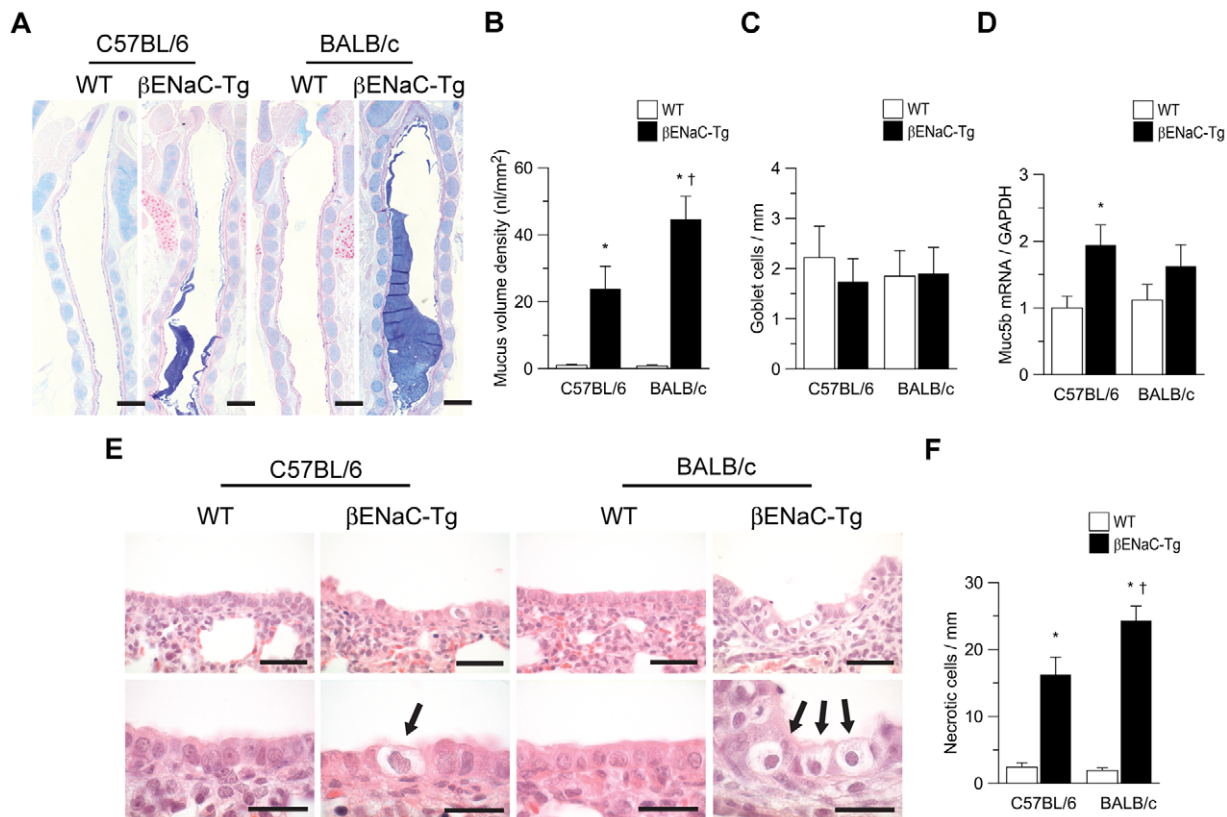

**Figure 4. Genetic background modifies early airway mucus obstruction and epithelial necrosis in neonatal βENaC-Tg mice.** A) Longitudinal sections of tracheae from neonatal (3-day-old) wild-type (WT) and βENaC-Tg mice on the C57BL/6 and BALB/c background. Sections were stained with Alcian blue–periodic acid Schiff (AB-PAS) to determine the presence of mucus and goblet cells. Scale bars = 200 μm. B–D) Summary of mucus content, as determined from measuring volume density of AB-PAS-positive material in the tracheal lumen (B), goblet cell numbers (C) and Transcript levels of Muc5b (D) ( $n = 4$ –13 mice per group). E) Airway histology from neonatal (3-day-old) WT and βENaC-Tg mice on the C57BL/6 and BALB/c background. Sections were stained with hematoxylin and eosin (H&E) and evaluated for degenerative airway epithelial cells (arrows). Scale bars = 40 μm (upper panels) and 20 μm (lower panels). F) Summary of airway epithelial necrosis as determined from the number of degenerative epithelial cells per mm of the basement membrane ( $n = 9$ –11 mice per group).  $*P < 0.001$  compared with WT mice on same strain background,  $\dagger P < 0.05$  compared with mice of same genotype on C57BL/6 background. doi:10.1371/journal.pone.0044059.g004



## Genetic background has no effect on chronic obstructive lung disease in adult $\beta$ ENaC-Tg mice

To determine, if the genetic background also affected the severity of chronic lung disease, we next compared the extent of airway mucus obstruction and goblet cell metaplasia in intrapulmonary airways, inflammation and emphysema characteristic of in 3-week-old surviving  $\beta$ ENaC-Tg mice on the C57BL/6 and BALB/c backgrounds [4] (Fig. S2). Several differences including densities of airway goblet cells and BAL leukocyte counts were observed in WT C57BL/6 compared to WT BALB/c mice (Fig. S2B,C,G). However, the extent of airway mucus obstruction and goblet cell metaplasia (Fig. S2A-C), emphysema formation as determined from measurements of mean linear intercepts and lung volume (Fig. S2D-F), and elevated BAL inflammatory cell counts did not differ in  $\beta$ ENaC-Tg C57BL/6 *versus*  $\beta$ ENaC-Tg BALB/c mice (Fig. S2G). These results indicate that background-related differences in CFTR-mediated  $\text{Cl}^-$  secretion improved neonatal survival, but had no impact on the severity of chronic lung disease in  $\beta$ ENaC-Tg mice.

## Lack of CFTR increases early airway mucus obstruction, airway epithelial necrosis and mortality in $\beta$ ENaC-Tg mice

For independent validation of the role of CFTR as a modifier of early airway disease in  $\beta$ ENaC-Tg mice, we next crossed  $\beta$ ENaC-Tg mice with gut-corrected CF mice [14] and compared survival, early mucus obstruction and airway epithelial necrosis in neonatal single-transgenic  $\beta$ ENaC-Tg mice and double-mutant  $\beta$ ENaC-Tg/CF mice (Fig. 5). Gut-corrected CF mice were used for these studies to determine effects on pulmonary mortality independent of concomitant mortality due to intestinal obstruction [14]. While the onset of mortality in single-transgenic  $\beta$ ENaC-Tg mice typically begins at  $\sim$ 3 days of age, initial studies indicated that most double-mutant  $\beta$ ENaC-Tg/CF mice died even earlier and escaped analyses because the carcasses were eaten by their dams. To obtain more accurate estimates of neonatal mortality, we therefore genotyped all remaining offspring from the intercross either on the day of birth (PN 0.5) or at the age of 3 days, and compared the frequencies of genotypes at the two time points. At birth, all genotypes were represented at the expected Mendelian ratios. At the age of 3 days, the frequency of alive single-transgenic  $\beta$ ENaC-Tg mice and CF mice remained unchanged, whereas the frequency of surviving  $\beta$ ENaC-Tg/CF mice was significantly reduced by  $\sim$ 70% ( $P < 0.05$ ) (Fig. 5A). Morphometric analyses of tracheal sections from neonatal (PN 0.5) mice demonstrated that intraluminal mucus obstruction was significantly increased in  $\beta$ ENaC-Tg/CF mice compared to single-transgenic  $\beta$ ENaC-Tg ( $P < 0.01$ ) littermates (Fig. 5B,C). Further, the numeric densities of necrotic airway cells were significantly increased in  $\beta$ ENaC-Tg/CF versus  $\beta$ ENaC-Tg mice (Fig. 5D,E). Similar to WT mice, CF mice did not show mucus obstruction or epithelial cell necrosis (data not shown). Levels of the pro-inflammatory cytokine KC were not different in lungs of newborn  $\beta$ ENaC-Tg and  $\beta$ ENaC-Tg/CF mice (Fig. S4A). In both groups, KC concentrations tended to be higher than in WT and CF mice, but this difference did not reach statistical significance. Similar, levels of TNF- $\alpha$  were neither elevated in newborn CF, nor in  $\beta$ ENaC-Tg or double-mutant  $\beta$ ENaC-Tg/CF mice compared to WT littermates (Fig. S4B). Collectively, these data demonstrate that lack of CFTR aggravates tracheal mucus obstruction, airway epithelial necrosis and mortality providing independent genetic evidence that CFTR modifies the onset of airway disease in  $\beta$ ENaC-Tg mice.

## Discussion

This study demonstrates that the genetic background has a substantial influence on CFTR activity in murine airways, and that genetically determined differences in CFTR function have profound effects on the severity of dehydration-induced lung disease in  $\beta$ ENaC-Tg mice. In the airways, CFTR acts as a cAMP-dependent  $\text{Cl}^-$  channel as well as a regulator of ENaC, and plays an important role in the regulation of proper airway surface hydration that is essential for effective mucociliary clearance [5,6,18,28,29]. In  $\beta$ ENaC-Tg mice, increased ENaC-mediated  $\text{Na}^+$  absorption and airway surface dehydration were associated with reduced mucus clearance and spontaneous airway mucus plugging resulting in neonatal mortality in a subset of  $\beta$ ENaC-Tg mice [4,15,30]. Further, recent studies identified hydropic degeneration and necrosis of  $\beta$ ENaC-Tg-expressing airways cells, likely triggered by cellular hypoxia caused by reduced oxygen tension due to airway mucus plugging, combined with increased oxygen demands due to excessive  $\text{Na}^+$  entry into cells, as another characteristic early lesion in  $\beta$ ENaC-Tg mice [4,26]. Our bioelectric studies in native airway tissues demonstrated that endogenous CFTR-mediated  $\text{Cl}^-$  secretion was  $\sim$ 50% decreased in both WT and  $\beta$ ENaC-Tg mice on the BALB/c compared to the C57BL/6 background (Figs. 2 and 3). In contrast, the magnitude of CaCC-mediated  $\text{Cl}^-$  secretion and ENaC-mediated  $\text{Na}^+$  absorption constituting other pathways critical for ASL regulation [26,27], were not influenced by the genetic background (Fig. 2 and Fig. S1). Decreased levels of CFTR function on the BALB/c background had no effects on airway morphology in WT mice, but were associated with strikingly more severe tracheal mucus plugging, airway epithelial necrosis and mortality in  $\beta$ ENaC-Tg mice (Figs. 1 and 4).

The importance of CFTR function in early airways disease was validated in independent studies, in which  $\beta$ ENaC-Tg mice were crossed with CFTR-deficient mice. These studies demonstrated that neonatal mucus obstruction, epithelial necrosis and mortality were substantially increased, when CFTR was genetically deleted in double-mutant  $\beta$ ENaC-Tg/CF mice compared to single transgenic  $\beta$ ENaC-Tg mice (Fig. 5). Interestingly, lack of CFTR enhanced these airway pathologies prior to the onset of inflammation, as determined from measurements of the pro-inflammatory cytokines KC and TNF- $\alpha$  in lungs from newborn mice (Fig. S4). These results are consistent with an important role of CFTR in the regulation of ENaC function in airway epithelia *in vivo*, as previously demonstrated in heterologous cells and airway epithelial cell lines *in vitro* [28,31–33]. Of note, a recent study demonstrated that overexpression of human CFTR (hCFTR) failed to ameliorate lung disease in  $\beta$ ENaC-Tg mice [34], probably due to different chromosomal integration sites of the transgenic constructs after pronuclear injection leading to expression of hCFTR and  $\beta$ ENaC transgenes in different subpopulations of Clara cells [35], or because hCFTR did not function properly in the context of mouse Clara cells [36]. In contrast to this transgenic approach based on overexpression of human CFTR [34], our studies relied on naturally occurring variability and knockout of endogenously expressed murine CFTR. Collectively, the results from our studies of  $\beta$ ENaC-Tg mice on different genetic backgrounds and the cross with CFTR-deficient mice indicate that genetically determined variability of endogenous CFTR function modulates the extent of ASL dehydration and that low levels or absence of CFTR-mediated  $\text{Cl}^-$  secretion aggravate the severity of early airway lesions and related pulmonary mortality in neonatal  $\beta$ ENaC-Tg mice.

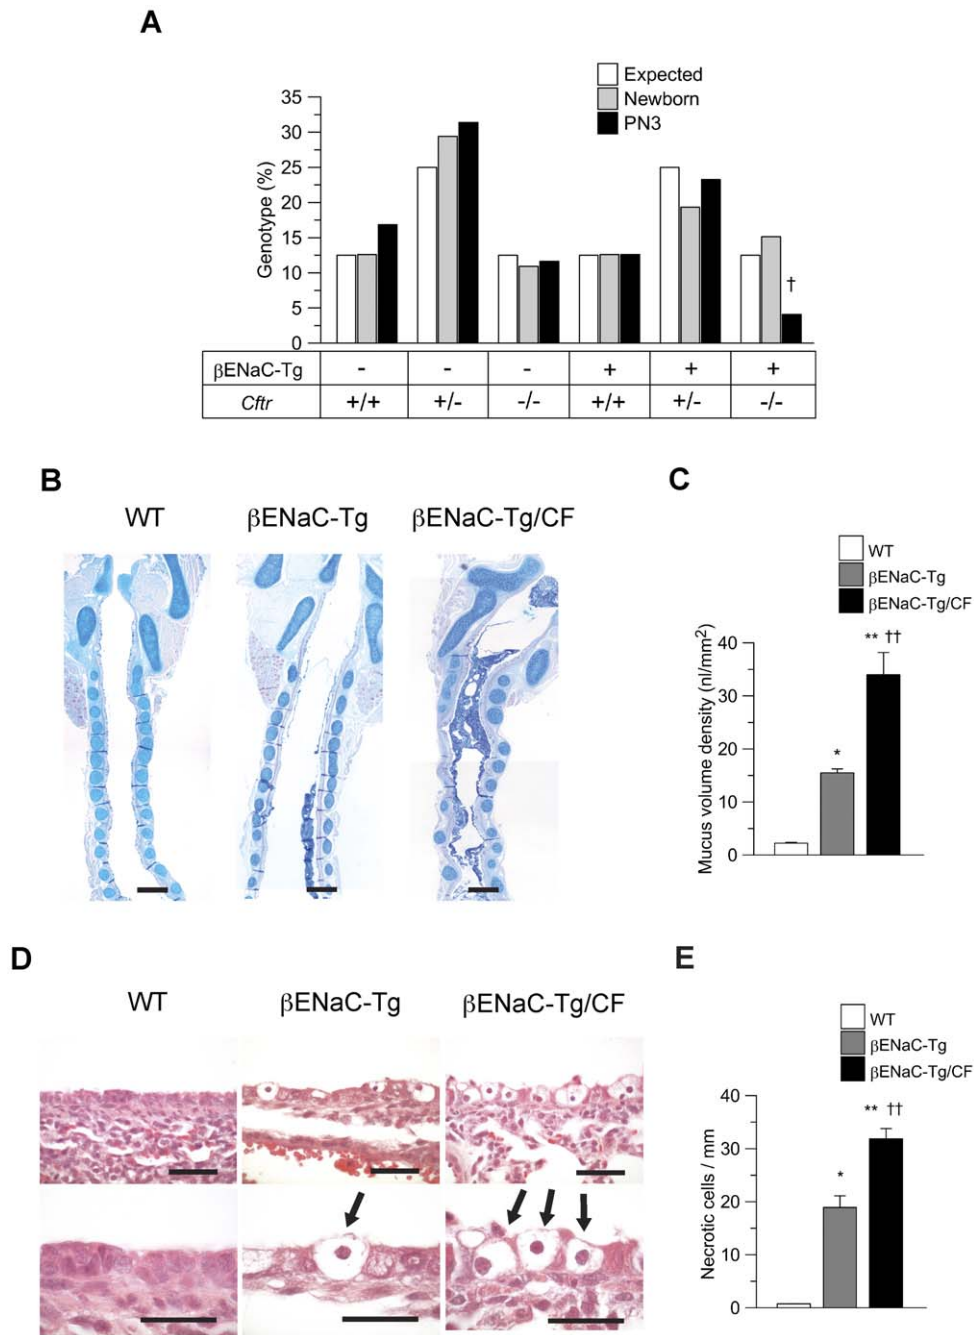

**Figure 5. Lack of CFTR increases early airway mucus obstruction, epithelial necrosis and mortality in  $\beta$ ENaC-Tg mice.** A) Neonatal mortality in double-mutant  $\beta$ ENaC-Tg/CF mice, single-transgenic  $\beta$ ENaC-Tg mice, CF mice and wild-type (WT) littermate controls was determined from the distribution of genotypes in newborn (PN 0.5) and 3-day-old pups from the intercross of  $\beta$ ENaC-Tg and CF mice ( $n = 119$ – $252$  mice per age group). <sup>†</sup> $P < 0.05$  compared with newborn mice of same genotype. B) Longitudinal sections of tracheae from newborn (PN 0.5) WT, single-transgenic  $\beta$ ENaC-Tg and double-mutant  $\beta$ ENaC-Tg/CF mice. Sections were stained with Alcian blue–periodic acid Schiff (AB-PAS) to determine the presence of intraluminal mucus. Scale bars =  $200 \mu\text{m}$ . C) Summary of mucus content, as determined from measuring volume density of AB-PAS-positive material in the lumen ( $n = 4$ – $6$  mice per group). D) Airway histology from neonatal (3-day-old) WT,  $\beta$ ENaC-Tg and double-mutant  $\beta$ ENaC-Tg/CF mice. Sections were stained with hematoxylin and eosin (H&E) and evaluated for degenerative airway epithelial cells (arrows). Scale bars =  $40 \mu\text{m}$  (upper panels) and  $20 \mu\text{m}$  (lower panels). E) Summary of airway epithelial necrosis as determined from the number of degenerative epithelial cells per mm of the basement membrane ( $n = 4$ – $10$  mice per group). \* $P < 0.01$  and \*\* $P < 0.001$  compared with WT, <sup>††</sup> $P < 0.01$  compared with  $\beta$ ENaC-Tg mice. doi:10.1371/journal.pone.0044059.g005

Conversely, background-dependent differences in CFTR function (Figs. 2 and 3) had no effect on the severity of COPD-like lung disease in surviving  $\beta$ ENaC-Tg mice (Fig. S3). These results, together with the observation that expression of the pro-

inflammatory cytokines KC and TNF- $\alpha$  were elevated to similar levels in  $\beta$ ENaC-Tg mice on both genetic backgrounds as early as 3 days of age (Fig. S2), suggests that the endogenous difference in CFTR activity (~2-fold) between airway tissues from C57BL/6



and BALB/c mice was not sufficient to prevent long-term consequences and secondary pathologies, including airway inflammation, mucus hypersecretion, goblet cell metaplasia and emphysema triggered by airway surface dehydration in  $\beta$ ENaC-Tg mice *in vivo* [4,13].

While it is well established that impaired CFTR-mediated  $\text{Cl}^-$  secretion and airway surface dehydration due to mutations in the *CFTR* gene cause cystic fibrosis (CF) with early onset and severe chronic obstructive airways disease [37–39], little is known about the relationship between endogenous variability of WT CFTR function and susceptibility for lung disease in humans. Interestingly, nasal potential difference (nPD) measurements in healthy non-smokers documented substantial (up to ~3-fold) inter-individual differences in the magnitude of CFTR-mediated  $\text{Cl}^-$  secretion [10,40]. These studies indicate that similar to our findings in inbred mouse strains, CFTR activity is also modulated by the genetic background in humans. Interestingly, a series of recent studies demonstrated that cigarette smoke, i.e. a common environmental exposure, has acute effects on CFTR activity in airway epithelia of healthy non-smokers causing ~60% inhibition of CFTR function *in vivo*, and causes airway surface dehydration and reduced mucus transport *in vitro* [10–12]. Further, emerging evidence suggests that smokers who developed COPD exhibit reduced CFTR-mediated  $\text{Cl}^-$  secretion and airway mucus dehydration. [11]. These results indicate that reduced CFTR function may be insufficient for proper mucus hydration in the presence of concomitant cigarette smoke-induced goblet cell metaplasia and mucin hypersecretion [8,41], and may thus set smokers at risk for mucus stasis and airways disease [7]. Our studies in mice indicate that a similar reduction (~50%) in endogenous CFTR activity on the BALB/c compared to the C57BL/6 background has indeed a significant impact on the development of mucus obstruction in the airways of  $\beta$ ENaC-Tg mice, where mucus is concentrated by increased ENaC-mediated  $\text{Na}^+$  and fluid absorption, as indexed by a substantial increase in the percent solids content of the ASL [15] (Figs. 2 to 4). In addition, recent reports demonstrated an inverse relationship between CFTR expression, ceramide accumulation and severity of emphysema in lung tissues from patients with COPD [42]. Further, studies in mice showed that cigarette-smoke decreased CFTR expression in lipid-rafts and demonstrated that CFTR plays an important role in the regulation of apoptotic and autophagic responses in cigarette-smoke induced lung epithelial injury [43]. These studies suggest that reduced CFTR levels in smokers may cause cellular dysfunctions, e.g. altered ceramide metabolism, that may play an important role in the pathogenesis of COPD independent of impaired epithelial  $\text{Cl}^-$  secretion and ASL homeostasis [44,45]. When viewed in combination, it is tempting to speculate that low levels of endogenous CFTR activity, in addition to other genetic and environmental factors [2,3], may constitute an important risk factor that makes smokers susceptible for developing COPD. However, future studies are required to determine the relationship between endogenous levels of CFTR-mediated  $\text{Cl}^-$  secretion, exposure to cigarette smoke and other environmental stimuli, and the risk for developing COPD.

In this context, it is noteworthy that a small molecule CFTR modulator, VX-770, recently developed to restore  $\text{Cl}^-$  channel function of mutant CFTR in patients with CF, was also shown to improve the activity of WT CFTR  $\text{Cl}^-$  channels [46] and restore cigarette-smoke induced impairment of CFTR-mediated  $\text{Cl}^-$  secretion, ASL homeostasis and mucus transport in cultured non-CF human bronchial epithelia *in vitro* [12]. In patients with CF with a specific *CFTR* mutation (G551D) that impairs gating of the CFTR  $\text{Cl}^-$  channel, treatment with VX-770 partially restored

CFTR-mediated  $\text{Cl}^-$  secretion in nasal epithelia and reduced airflow obstruction and pulmonary exacerbations related to CFTR dysfunction [47,48]. If future studies in humans can confirm the results from our murine studies demonstrating an inverse relationship between WT CFTR function and severity of obstructive airway disease, VX-770 and potentially other CFTR modulators that improve surface expression and/or function of WT CFTR  $\text{Cl}^-$  channels [49] may provide therapeutic opportunities for COPD in a subgroup of individuals with low levels of endogenous CFTR activity produced by either genetic factors or environmental factors such as cigarette smoke [12]. However, our results in neonatal and adult  $\beta$ ENaC-overexpressing mice on different genetic backgrounds (C57BL/6, BALB/c and *CFTR*<sup>-/-</sup>) (Fig. 4,5 and Fig. S3) also indicate that pharmacological augmentation of CFTR function may be more effective in the early pathogenesis, and that late treatment may not be able to correct or revert established COPD with chronic mucus hypersecretion, airways inflammation and emphysema.

Our phenotype-driven studies did not allow us to identify the mechanisms underlying increased CFTR activity in airways from C57BL/6 compared to BALB/c mice. Analyses of CFTR mRNA expression by real-time RT-PCR demonstrated that CFTR transcript levels were not different in WT or  $\beta$ ENaC-Tg airway tissues from C57BL/6 *versus* BALB/c mice suggesting that strain-dependent differences in CFTR-mediated  $\text{Cl}^-$  secretion reflected differences in post-transcriptional and/or post-translational regulation of CFTR processing, trafficking, protein lifetime, or autocrine signalling that regulates CFTR activity at the apical plasma membrane. We expect that the backcross of the  $\beta$ ENaC-Tg mouse onto distinct isogenic backgrounds performed in this study, will facilitate the use of genomics approaches such as analyses of quantitative trait loci or whole genome sequencing [50] to identify the molecular mechanisms underlying the genetically determined differences in CFTR activity, and potentially identify other modifiers that may contribute to the striking differences in the neonatal airways phenotype of  $\beta$ ENaC-Tg mice on the C57BL/6 and BALB/c backgrounds.

In summary, our studies demonstrate that low levels or absence of CFTR-mediated  $\text{Cl}^-$  secretion aggravate early airway mucus obstruction and pulmonary mortality associated with COPD-like lung disease in  $\beta$ ENaC-Tg mice. These results suggest that genetic or environmental factors that modify CFTR function may modulate the onset and severity of airway mucus obstruction and that CFTR may serve as a potential therapeutic target in patients with COPD.

## Supporting Information

**Figure S1 Genetic background has no effect on  $\alpha$ ,  $\beta$  and  $\gamma$ ENaC expression and ENaC-mediated  $\text{Na}^+$  transport in airways of wild-type and  $\beta$ ENaC-Tg mice.** A–C) Transcript levels of  $\alpha$ ENaC (A),  $\beta$ ENaC (B) and  $\gamma$ ENaC (C) in freshly excised tracheal tissues from neonatal wild-type (WT) and  $\beta$ ENaC-Tg mice on the C57BL/6 and BALB/c background. Data are expressed as fold changes from WT mice on the C57BL/6 background ( $n = 4–5$  samples pooled from 16–20 mice per group). D–F) Amiloride dose-response curves (D,E) and summary of  $\text{IC}_{50}$  values (F) obtained from tracheal tissues of neonatal WT and  $\beta$ ENaC-Tg mice on the C57BL/6 and BALB/c background ( $n = 6–9$  mice per group). Data are presented as mean  $\pm$  SEM. \* $P < 0.01$  and \*\* $P < 0.001$  compared with WT mice on same strain background, † $P < 0.05$  compared with mice of same genotype on C57BL/6 background. (TIF)

**Figure S2 Genetic background has no effect on early airway inflammation in neonatal  $\beta$ ENaC-Tg mice.** A, B) Levels of KC (A) and TNF- $\alpha$  (B) in lung homogenates from 3-day-old neonatal wild-type (WT) and  $\beta$ ENaC-Tg mice on the C57BL/6 and BALB/c background ( $n = 5-10$  mice per group). Data are presented as mean  $\pm$  SEM. \* $P < 0.05$  compared with WT mice on same strain background. (TIF)

**Figure S3 Genetic background has no effect on chronic lung disease in adult  $\beta$ ENaC-Tg mice.** A) Representative airway morphology of adult (3-week-old) wild-type (WT) and  $\beta$ ENaC-Tg mice on the C57BL/6 and BALB/c background. Sections were stained with Alcian blue-periodic acid Schiff (AB-PAS) to determine the presence of airway mucus and goblet cells. Scale bars = 200  $\mu$ m. B,C) Summary of mucus content, as determined from measuring volume density of AB-PAS-positive material in the airway lumen (B), and goblet cell numbers (C) ( $n = 9-20$  mice per group). D) Representative morphology of distal airspaces. Sections were stained with hematoxylin and eosin (H&E). Scale bars = 100  $\mu$ m. E-G) Summary of mean linear intercepts (E), lung volume (F), and total and differential cell counts in bronchoalveolar lavage (BAL) fluid (G) from adult WT and  $\beta$ ENaC-Tg mice on the C57BL/6 and BALB/c background ( $n = 5-18$  mice per group). Data are presented as mean  $\pm$  SEM. \* $P < 0.05$  and \*\* $P < 0.001$  compared with WT mice on same strain

background,  $^{\dagger}P < 0.001$  compared with mice of same genotype on C57BL/6 background. (TIF)

**Figure S4 Lack of CFTR does not cause airway inflammation in neonatal mice.** A, B) Levels of KC (A) and TNF- $\alpha$  (B) in lung homogenates from newborn (PN 0.5) wild-type (WT),  $\beta$ ENaC-Tg, CFTR-deficient (CF) and double mutant  $\beta$ ENaC-Tg/CF mice ( $n = 5-8$  mice per group). Data are presented as mean  $\pm$  SEM. No significant differences were detected between the four experimental groups. (TIF)

## Acknowledgments

We thank Dr. Jeffrey A. Whitsett, Cincinnati Children's Hospital Medical Center Cincinnati, USA for providing gut corrected CF mice (FABP-hCFTR-CFTR $^{-/-}$ ), Dr. Gergely Lukacs and Dr Guido Veit, McGill University Montreal, Canada and Dr. Hugo de Jonge, Erasmus University Medical Center Rotterdam, The Netherlands for advice on CFTR immunoblotting, and Tomi Bähr-Ivacevic, EMBL Genomics Core Facility for expert technical assistance.

## Author Contributions

Conceived and designed the experiments: BJ MAM. Performed the experiments: BJ SH JS. Analyzed the data: BJ MAM. Wrote the paper: BJ MAM CS.

## References

- Rabe KF, Hurd S, Anzueto A, Barnes PJ, Buist SA, et al. (2007) Global strategy for the diagnosis, management, and prevention of chronic obstructive pulmonary disease: GOLD executive summary. *Am J Respir Crit Care Med* 176: 532–555.
- Silverman EK (2006) Progress in chronic obstructive pulmonary disease genetics. *Proc Am Thorac Soc* 3: 405–408.
- Cookson WO, Moffatt MF (2011) Genetics of complex airway disease. *Proc Am Thorac Soc* 8: 149–153.
- Mall MA, Harkema JR, Trojanek JB, Treis D, Livraghi A, et al. (2008) Development of chronic bronchitis and emphysema in  $\beta$ -epithelial Na $^{+}$  channel-overexpressing mice. *Am J Respir Crit Care Med* 177: 730–742.
- Knowles MR, Boucher RC (2002) Mucus clearance as a primary innate defense mechanism for mammalian airways. *J Clin Invest* 109: 571–577.
- Mall MA (2008) Role of cilia, mucus, and airway surface liquid in mucociliary dysfunction: lessons from mouse models. *J Aerosol Med Pulm Drug Deliv* 21: 13–24.
- Goodman RM, Yergin BM, Landa JF, Golivanux MH, Sackner MA (1978) Relationship of smoking history and pulmonary function tests to tracheal mucus velocity in nonsmokers, young smokers, ex-smokers, and patients with chronic bronchitis. *Am Rev Respir Dis* 117: 205–214.
- Hogg JC, Timens W (2009) The pathology of chronic obstructive pulmonary disease. *Annu Rev Pathol* 4: 435–459.
- Welsh MJ (1983) Cigarette smoke inhibition of ion transport in canine tracheal epithelium. *J Clin Invest* 71: 1614–1623.
- Cantin AM, Hanrahan JW, Bilodeau G, Ellis L, Dupuis A, et al. (2006) Cystic fibrosis transmembrane conductance regulator function is suppressed in cigarette smokers. *Am J Respir Crit Care Med* 173: 1139–1144.
- Clunes LA, Davies CM, Coakley RD, Aleksandrov AA, Henderson AG, et al. (2012) Cigarette smoke exposure induces CFTR internalization and insolubility, leading to airway surface liquid dehydration. *FASEB J* 26: 533–545.
- Sloane PA, Shastry S, Wilhelm A, Courville C, Tang LP, et al. (2012) A pharmacologic approach to acquired cystic fibrosis transmembrane conductance regulator dysfunction in smoking related lung disease. *PLoS ONE* 7: e39809.
- Wielputz MO, Eichinger M, Zhou Z, Leotta K, Hirtz S, et al. (2011) In vivo monitoring of cystic fibrosis-like lung disease in mice by volumetric computed tomography. *Eur Respir J* 38: 1060–1070.
- Zhou L, Dey CR, Wert SE, DuVall MD, Frizzell RA, et al. (1994) Correction of lethal intestinal defect in a mouse model of cystic fibrosis by human CFTR. *Science* 266: 1705–1708.
- Mall M, Grubb BR, Harkema JR, O'Neal WK, Boucher RC (2004) Increased airway epithelial Na $^{+}$  absorption produces cystic fibrosis-like lung disease in mice. *Nat Med* 10: 487–493.
- Zhou Z, Duerr J, Johannesson B, Schubert SC, Treis D, et al. (2011) The ENaC-overexpressing mouse as a model of cystic fibrosis lung disease. *J Cyst Fibros* 10 Suppl 2: S172–S182.
- Anagnostopoulou P, Dai L, Schatterny J, Hirtz S, Duerr J, et al. (2010) Allergic airway inflammation induces a pro-secretory epithelial ion transport phenotype in mice. *Eur Respir J* 36: 1436–1447.
- Mall M, Bleich M, Greger R, Schreiber R, Kunzelmann K (1998) The amiloride inhibitable Na $^{+}$  conductance is reduced by CFTR in normal but not in cystic fibrosis airways. *J Clin Invest* 102: 15–21.
- Roth EK, Hirtz S, Duerr J, Wenning D, Eichler I, et al. (2011) The K $^{+}$  channel opener 1-EBIO potentiates residual function of mutant CFTR in rectal biopsies from cystic fibrosis patients. *PLoS ONE* 6: e24445.
- Harkema JR, Plopper CG, Hyde DM, St George JA (1987) Regional differences in quantities of histochemically detectable mucosubstances in nasal, paranasal, and nasopharyngeal epithelium of the bonnet monkey. *J Histochem Cytochem* 35: 279–286.
- Zhou Z, Treis D, Schubert SC, Harm M, Schatterny J, et al. (2008) Preventive but not late amiloride therapy reduces morbidity and mortality of lung disease in  $\beta$ ENaC-overexpressing mice. *Am J Respir Crit Care Med* 178: 1245–1256.
- Scherle W (1970) A simple method for volumetry of organs in quantitative stereology. *Mikroskopie* 26: 57–60.
- Dunnill MS (1962) Quantitative methods in the study of pulmonary pathology. *Thorax* 17: 320–328.
- Pfaffl MW (2001) A new mathematical model for relative quantification in real-time RT-PCR. *Nucleic Acids Res* 29: E45.
- McNicholas CM, Canessa CM (1997) Diversity of channels generated by different combinations of epithelial sodium channel subunits. *J Gen Physiol* 109: 681–692.
- Mall MA, Button B, Johannesson B, Zhou Z, Livraghi A, et al. (2010) Airway surface liquid volume regulation determines different airway phenotypes in Liddle compared with  $\beta$ ENaC-overexpressing mice. *J Biol Chem* 285: 26945–26955.
- Rock JR, O'Neal WK, Gabriel SE, Randell SH, Harfe BD, et al. (2009) Transmembrane protein 16A (TMEM16A) is a Ca $^{2+}$ -regulated Cl $^{-}$  secretory channel in mouse airways. *J Biol Chem* 284: 14875–14880.
- Stutts MJ, Canessa CM, Olsen JC, Hamrick M, Cohn JA, et al. (1995) CFTR as a cAMP-dependent regulator of sodium channels. *Science* 269: 847–850.
- Hopf A, Schreiber R, Mall M, Greger R, Kunzelmann K (1999) Cystic fibrosis transmembrane conductance regulator inhibits epithelial Na $^{+}$  channels carrying Liddle's syndrome mutations. *J Biol Chem* 274: 13894–13899.
- Livraghi-Butrico A, Grubb BR, Kelly EJ, Wilkinson KJ, Yang H, et al. (2012) Genetically determined heterogeneity of lung disease in a mouse model of airway mucus obstruction. *Physiol Genomics* 44: 470–484.
- Mall M, Hipper A, Greger R, Kunzelmann K (1996) Wild type but not  $\Delta$ F508 CFTR inhibits Na $^{+}$  conductance when coexpressed in *Xenopus* oocytes. *FEBS Lett* 381: 47–52.
- Rubenstein RC, Lockwood SR, Lide E, Bauer R, Suaud L, et al. (2011) Regulation of endogenous ENaC functional expression by CFTR and  $\Delta$ F508-CFTR in airway epithelial cells. *Am J Physiol Lung Cell Mol Physiol* 300: L88–L101.

33. Mall MA (2009) Role of the amiloride-sensitive epithelial Na<sup>+</sup> channel in the pathogenesis and as a therapeutic target for cystic fibrosis lung disease. *Exp Physiol* 94: 171–174.
34. Grubb BR, O'Neal WK, Ostrowski LE, Kreda SM, Button B, et al. (2012) Transgenic hCFTR expression fails to correct  $\beta$ -ENaC mouse lung disease. *Am J Physiol Lung Cell Mol Physiol* 302: L238–L247.
35. Duerr J, Gruner M, Schubert SC, Haberkorn U, Bujard H, et al. (2011) Use of a new-generation reverse tetracycline transactivator system for quantitative control of conditional gene expression in the murine lung. *Am J Respir Cell Mol Biol* 44: 244–254.
36. Collawn JF, Lazrak A, Bebok Z, Matalon S (2012) The CFTR and ENaC Debate – How Important is ENaC in CF Lung Disease? *Am J Physiol Lung Cell Mol Physiol* 302: L1141–6.
37. Welsh MJ, Ramsey BW, Accurso F, Cutting GR (2001) Cystic fibrosis. In: Scriver CR, Beaudet AL, Sly WS, and Valle D, editors. *The Metabolic & Molecular Bases of Inherited Disease*. New York: McGraw-Hill. 5121–5188.
38. Kunzelmann K, Mall M (2001) Pharmacotherapy of the ion transport defect in cystic fibrosis. *Clin Exp Pharmacol Physiol* 28: 857–867.
39. Sly PD, Brennan S, Gangell C, de Klerk N, Murray C, et al. (2009) Lung disease at diagnosis in infants with cystic fibrosis detected by newborn screening. *Am J Respir Crit Care Med* 180: 146–152.
40. Knowles MR, Paradiso AM, Boucher RC (1995) In vivo nasal potential difference: techniques and protocols for assessing efficacy of gene transfer in cystic fibrosis. *Hum Gene Ther* 6: 445–455.
41. Boucher RC (2004) Relationship of airway epithelial ion transport to chronic bronchitis. *Proc Am Thorac Soc* 1: 66–70.
42. Bodas M, Min T, Mazur S, Vij N (2011) Critical modifier role of membrane-cystic fibrosis transmembrane conductance regulator-dependent ceramide signaling in lung injury and emphysema. *J Immunol* 186: 602–613.
43. Bodas M, Min T, Vij N (2011) Critical role of CFTR-dependent lipid rafts in cigarette smoke-induced lung epithelial injury. *Am J Physiol Lung Cell Mol Physiol* 300: L811–L820.
44. Teichgraber V, Ulrich M, Endlich N, Riethmuller J, Wilker B, et al. (2008) Ceramide accumulation mediates inflammation, cell death and infection susceptibility in cystic fibrosis. *Nat Med* 14: 382–391.
45. Petrache I, Natarajan V, Zhen L, Medler TR, Richter AT, et al. (2005) Ceramide upregulation causes pulmonary cell apoptosis and emphysema-like disease in mice. *Nat Med* 11: 491–498.
46. Van Goor F, Hadida S, Grootenhuis PD, Burton B, Cao D, et al. (2009) Rescue of CF airway epithelial cell function in vitro by a CFTR potentiator, VX-770. *Proc Natl Acad Sci USA* 106: 18825–18830.
47. Accurso FJ, Rowe SM, Clancy JP, Boyle MP, Dunitz JM, et al. (2010) Effect of VX-770 in persons with cystic fibrosis and the G551D-CFTR mutation. *N Engl J Med* 363: 1991–2003.
48. Ramsey BW, Davies J, McElvaney NG, Tullis E, Bell SC, et al. (2011) A CFTR potentiator in patients with cystic fibrosis and the G551D mutation. *N Engl J Med* 365: 1663–1672.
49. Becq F, Mall MA, Sheppard DN, Conese M, Zegarra-Moran O (2011) Pharmacological therapy for cystic fibrosis: from bench to bedside. *J Cyst Fibros* 10 Suppl 2: S129–S145.
50. Peters LL, Robledo RF, Bult CJ, Churchill GA, Paigen BJ, et al. (2007) The mouse as a model for human biology: a resource guide for complex trait analysis. *Nat Rev Genet* 8: 58–69.
